# Supplementary material for: Hypoxia coordinates the spatial landscape of myeloid cells within glioblastoma to affect survival
Source: PubMed Central journal article supplement (PMC11100569; doi:10.1126/sciadv.adj3301), 2024-05-17
Supplement: sciadv.adj3301_sm.pdf [file sciadv.adj3301_sm.pdf]

Supplementary Materials for  
**Hypoxia coordinates the spatial landscape of myeloid cells within  
glioblastoma to affect survival**

Michael J. Haley *et al.*

Corresponding author: Kevin N. Couper, [kevin.couper@manchester.ac.uk](mailto:kevin.couper@manchester.ac.uk);  
Michael J. Haley, [michael.haley@manchester.ac.uk](mailto:michael.haley@manchester.ac.uk)

*Sci. Adv.* **10**, eadj3301 (2024)  
DOI: 10.1126/sciadv.adj3301

**This PDF file includes:**

Figs. S1 to S7

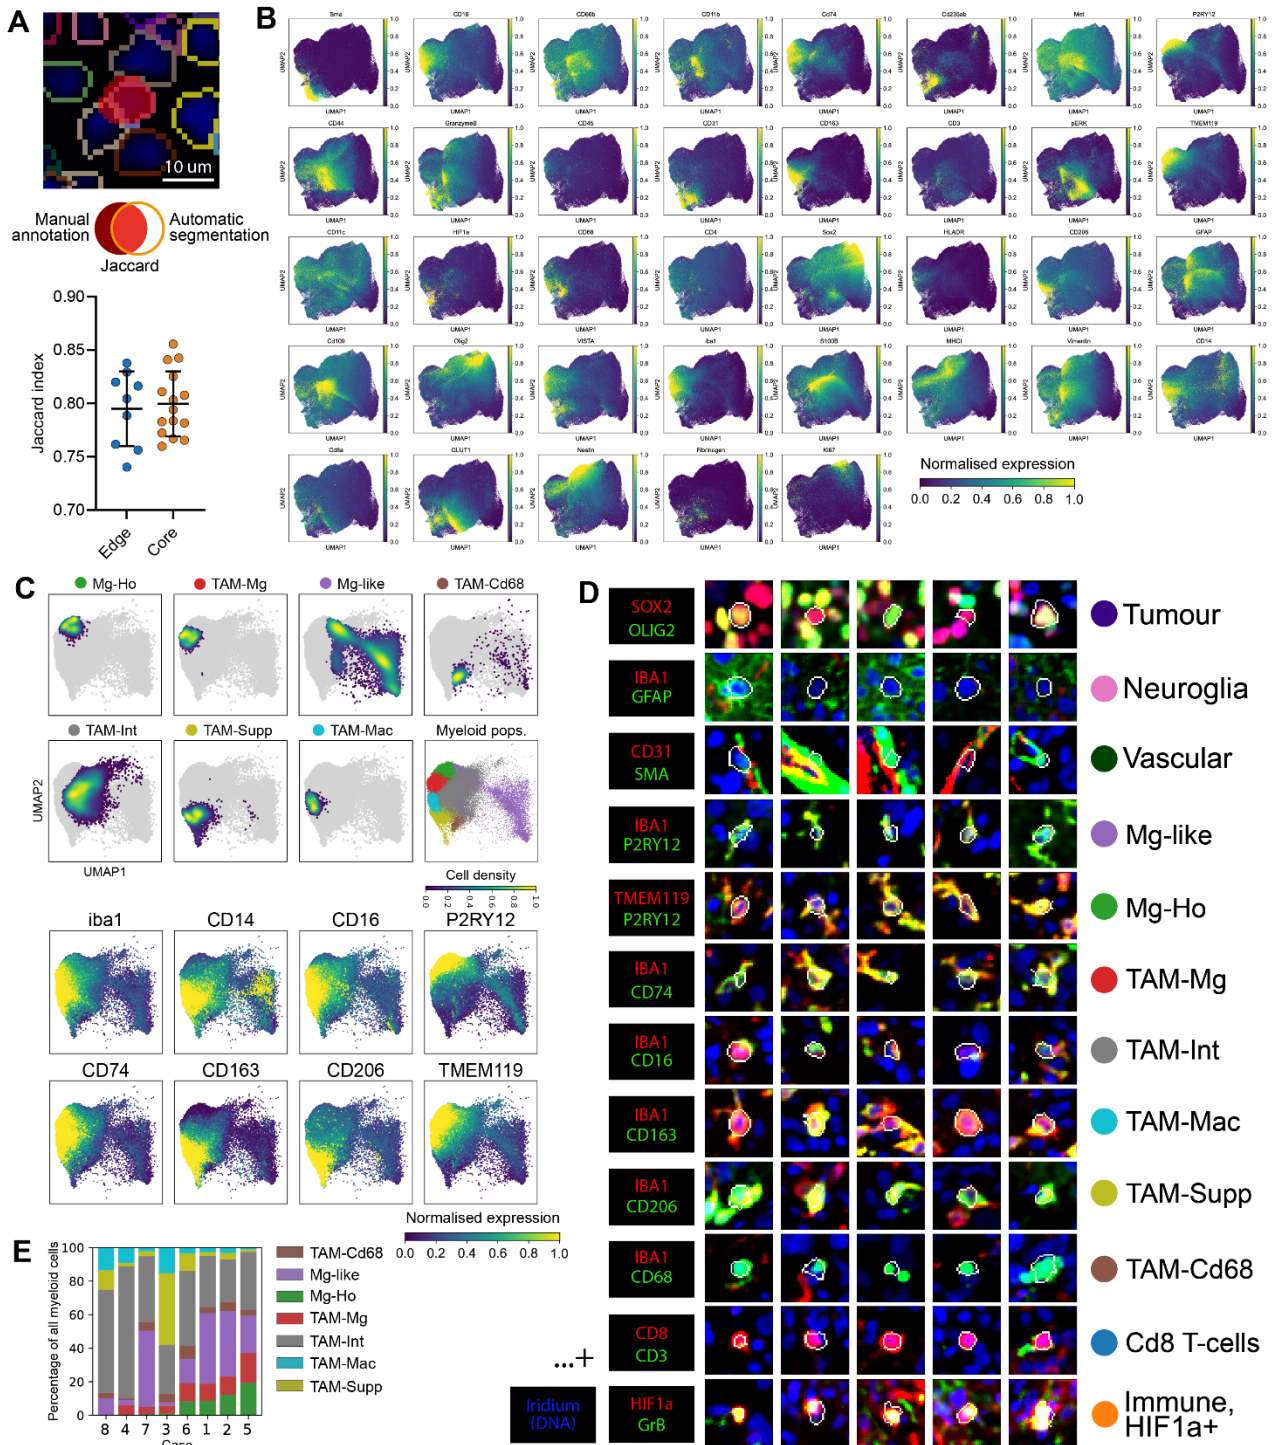

Supplemental fig. S1

**A.** Jaccard analysis demonstrating the overlap between manual annotation and the automatic segmentation pipeline. Data shown as mean  $\pm$  standard deviation. **B.** UMAPs visualising the single-cell data acquired from the IMC workflow from all cases, demonstrating the distribution of all the markers in the panel. Each marker is normalised to the 99<sup>th</sup> percentile of its expression. **C.** UMAP embedding of the different myeloid populations alongside key myeloid markers used for population identification. **D.** Representative IMC images of each of the populations as identified and segmented (white border) in the tumour microenvironment. **E.** Percentage of all myeloid cells made up by the different populations in each case.

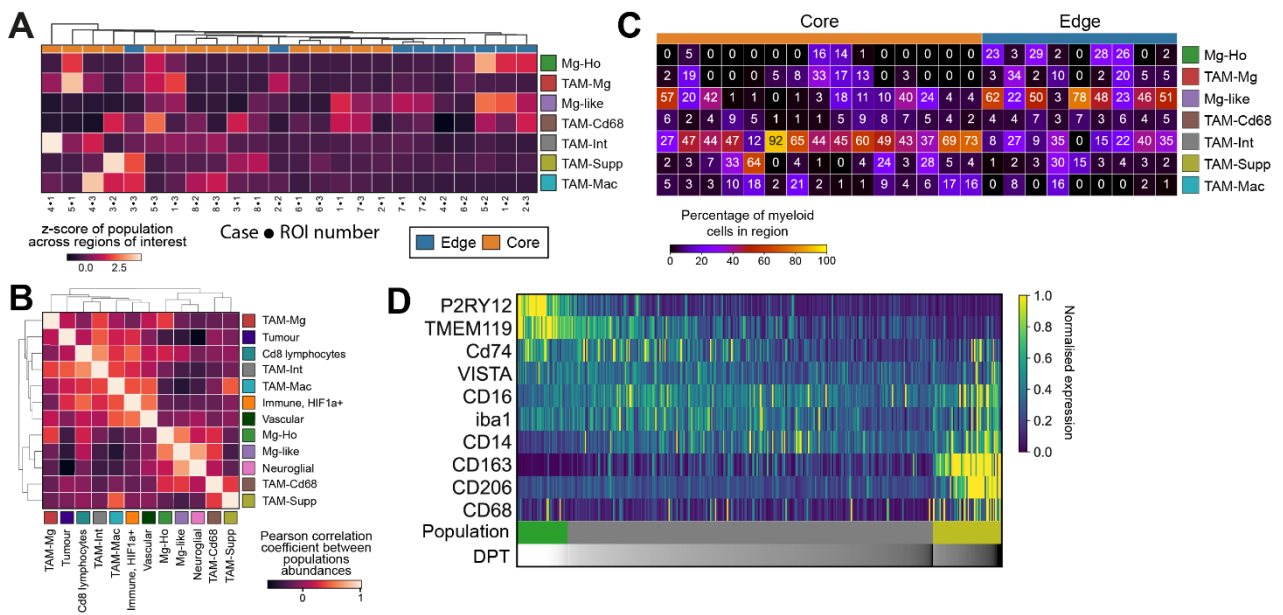

## Supplemental fig. S2

**A.** K-means clustering of regions of interest based upon myeloid cell abundance. **B.** Pearson's correlation coefficient between populations in each region. **C.** Percentage of total myeloid cells made up by each population in each region. **D.** Diffusion pseudotime modelling a potential pathway of differentiation from homeostatic microglia (Mg-Ho), through a macrophage/microglia intermediary state (TAM-Int), into immunosuppressive myeloid cells (TAM-Supp).

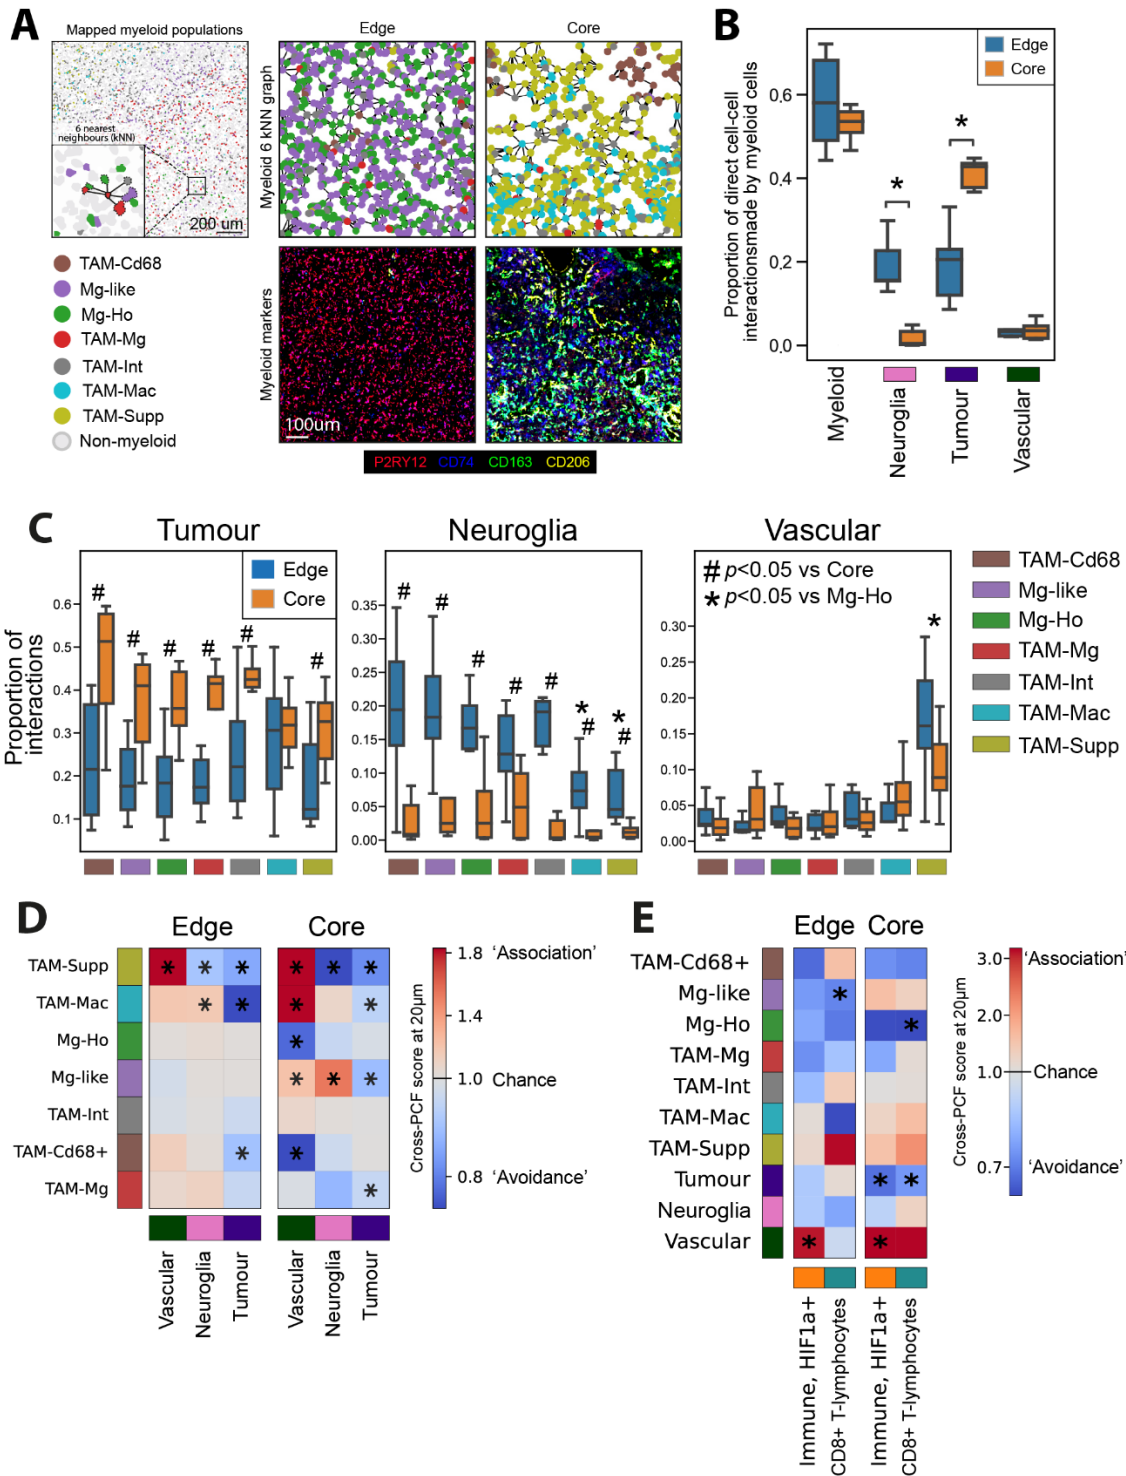

### Supplemental fig. S3

**A.** Demonstration of how the distribution of myeloid cells can be assessed by connecting each myeloid cell to its nearest 6 neighbours, with representative examples of the resulting graphs from edge and core regions, and associated IMC images for myeloid markers. **B.** Proportion of cell-cell interactions made by all myeloid cells (not broken down into separate populations) with non-myeloid cells. Comparison made by linear mixed model. **C.** Proportion of direct cell-to-cell interactions made by myeloid populations with non-myeloid cells, compared between edge and core regions. Comparison made by linear mixed model. **D.** Cell-cell interactions between myeloid populations and non-myeloid cells as quantified using the cross- pair correlation function (cross-PCF). **E.** Cell-cell interactions made by CD8 and HIF1+ immune populations with other populations as quantified using the cross- pair correlation function. \* $p < 0.05$  versus complete spatial randomness (where cross-PCF score would equal 1). Box plots show range, interquartile range, and median of data (**B**, **C**).



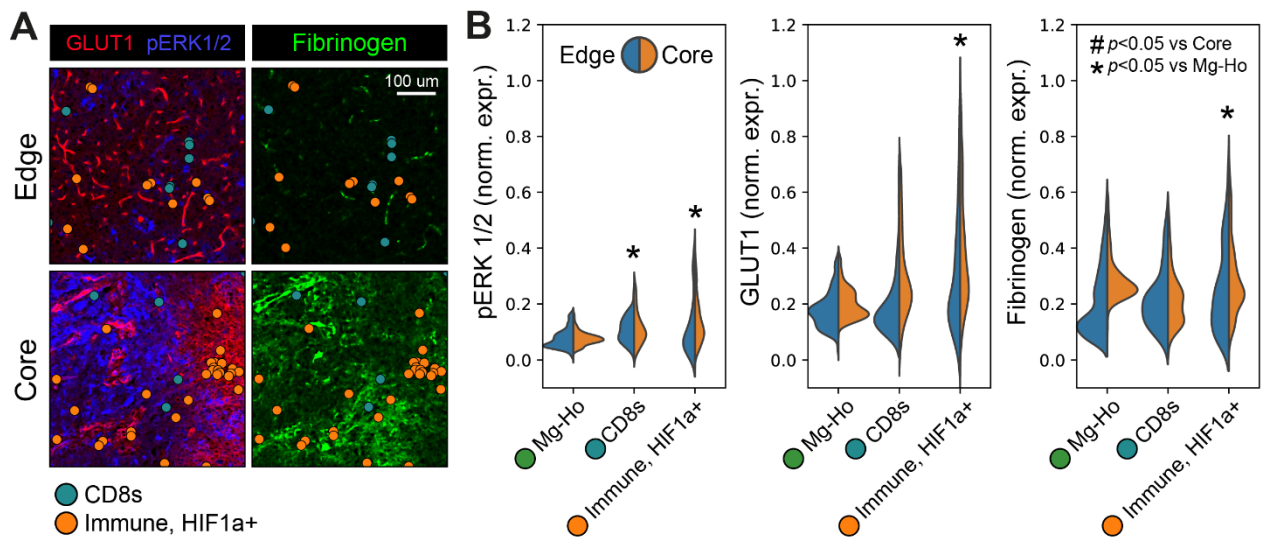

### Supplemental fig. S4

**A.** CD8 and HIF1a+ immune populations mapped alongside markers of environmental hypoxia in GLUT1 and pERK1/2 staining, or fibrinogen. **B.** Quantification of environmental pERK1/2, GLUT1 and fibrinogen staining around each population in edge and core regions. A cell's environment was defined as a 40  $\mu\text{m}$  square centred on the cell. Comparisons made by linear mixed models with Holm-Šidák corrections. Violin plot shows range and distribution of data.

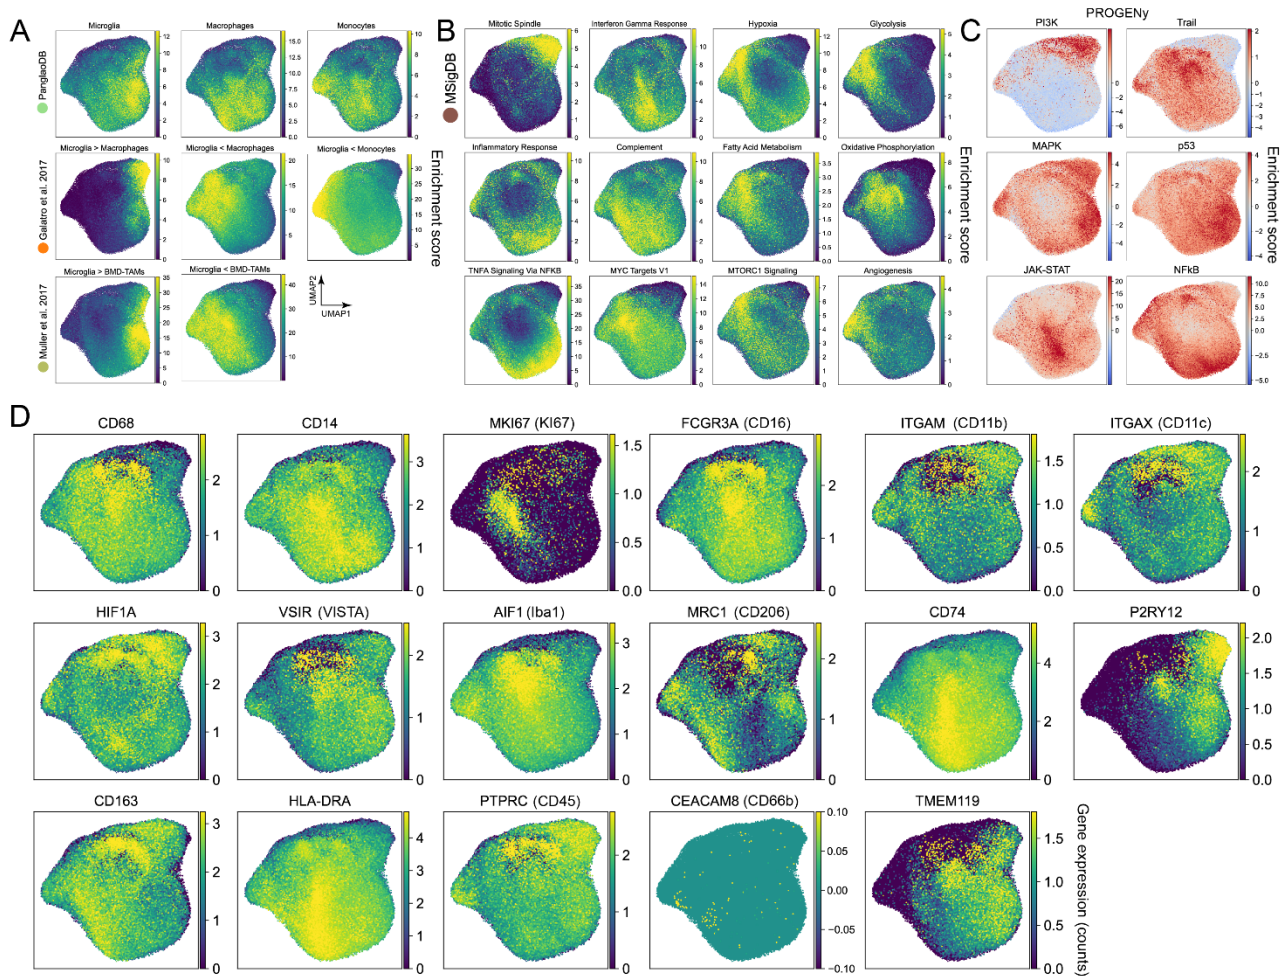

### Supplemental fig. S5

Enrichment of specified gene lists was calculated by over representation analysis (ORA) for individual cells, which was then plotted by UMAP. **A**. ORA of gene lists differentiating microglia, macrophages, and monocytes (6, 55, 80). **B**. ORA of biological processes from the MSigDB database (79). **C**. Activation or suppression of signalling pathways assessed by reference to the PROGENy database (70). These analyses (**A**, **B**, **C**) were performed using the *Decoupler* package in Python. **D**. Expression of the genes encoding the myeloid proteins targeted by the IMC antibody panel.

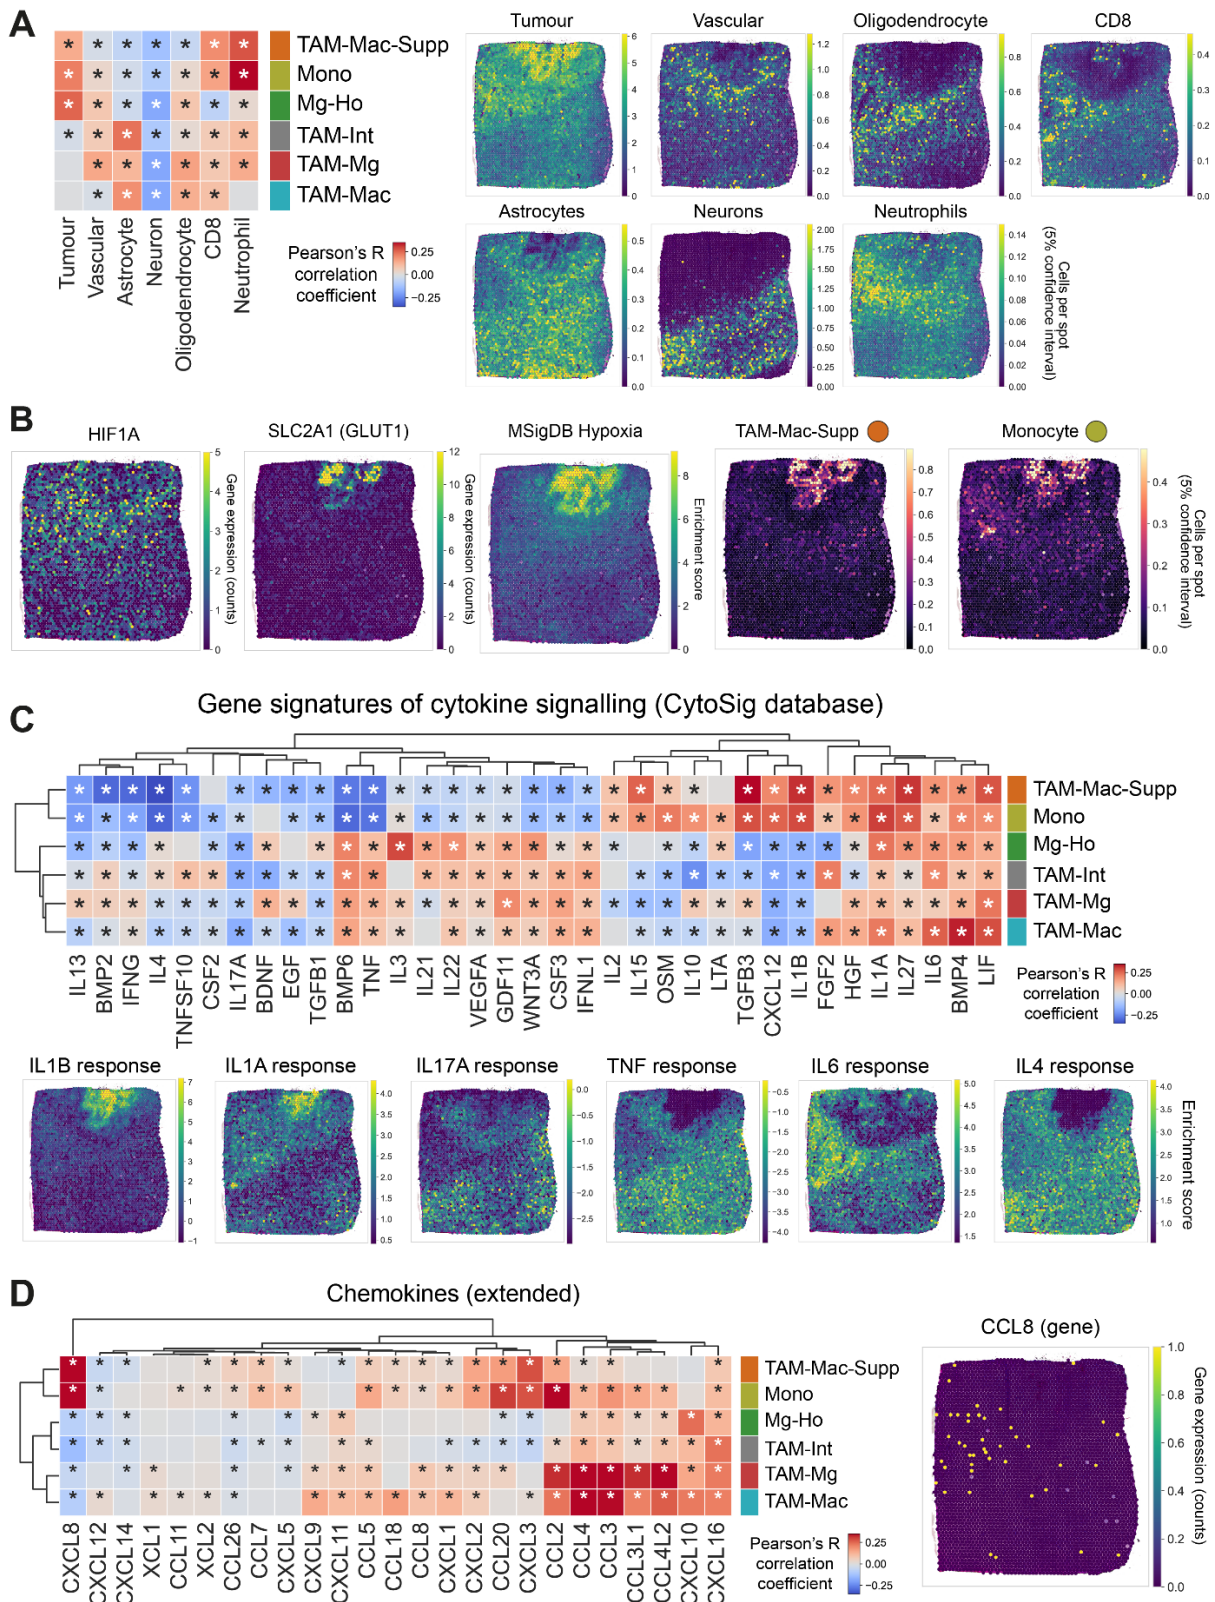

## Supplemental fig. S6

**A.** Pearson's R correlation between the different myeloid populations and non-myeloid populations present in each spot. **B.** Representative ST case showing the distribution of the GLUT1 (SLC2A1) and HIF1A genes alongside the MSigDB hypoxia signature, and abundance of immunosuppressive macrophages (TAM-Mac-Supp) and monocytes. **C, D.** Myeloid cell abundances were correlated with the transcriptomic signatures of response to cytokine signalling from the CytoSig database (**C**) or individual chemokine genes (*Extended from Figure 5J* to also include chemokines that showed less variability between populations). \* $p < 0.05$ , with correction for multiple Pearson's R tests using the Benjamini-Hochberg procedure (**A, C, D**).

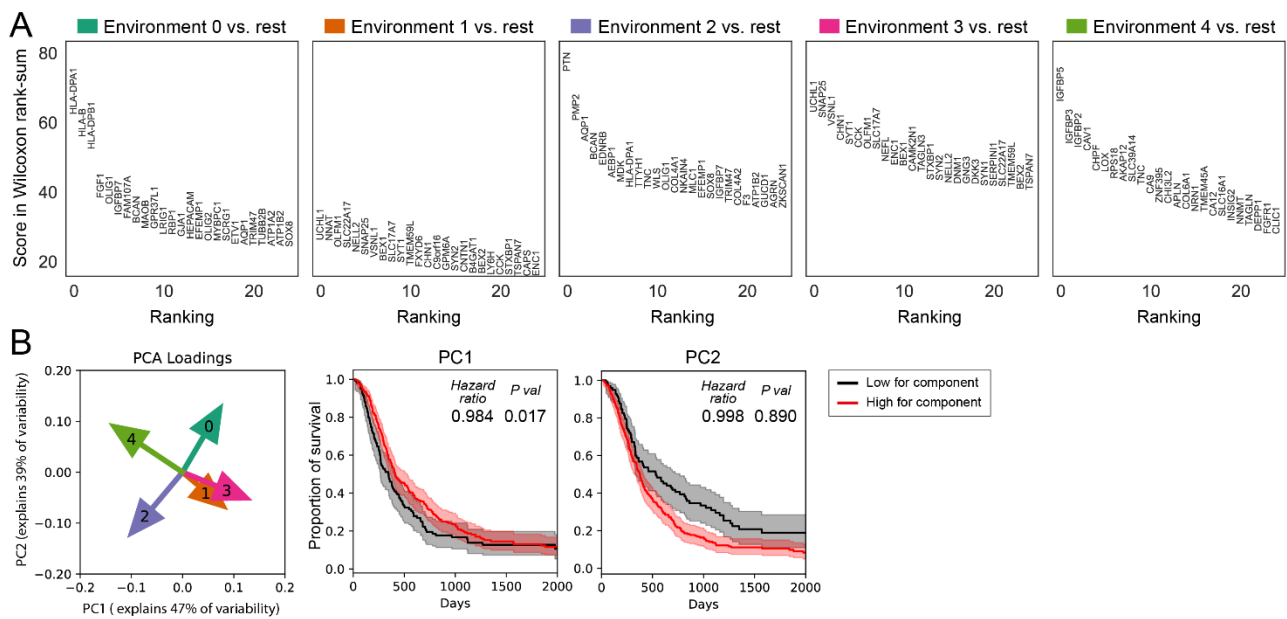

### Supplemental fig. S7

**A.** The genetic changes associated with non-myeloid cells in each myeloid environment were extracted as described in **Figure 6E**. The top 25 differentially expressed non-myeloid genes differentiating each myeloid environment from the others was then calculated by Wilcoxon rank-sum analysis. **B.** Principal components analysis was used to summarise the abundance of the 5 myeloid environments into two principal components, which are by definition not correlated. The relationship between these principal components and GBM survival was modelled using Cox proportional-hazards, and top 50% and bottom 50% of patients for these PCs compared by Kaplan-Meier curves, shaded areas indicate 95% confidence intervals.
